# Supplementary material for: Horizontal nDEP cages within open microwell arrays for precise positioning of cells and particles
Source: Royal Society of Chemistry journal article supplement (doi:10.1039/b923567a), 2010-01-01
Supplement: b923567a.pdf [file b923567a.pdf]

# Horizontal nDEP cages within open microwell arrays for precise positioning of cells and particles

Marta Lombardini<sup>a</sup>, Massimo Bocchi<sup>a,b</sup>, Laura Rambelli<sup>a</sup>, Luca Giulianelli<sup>a</sup> and Roberto Guerrieri<sup>a</sup>

## Supplementary information

### Calculus of the trans-membrane potential

A relevant parameter describing this effect is the trans-membrane potential (TMP)<sup>23,24</sup> induced by an external field across the cell membrane. For a spherical cell in suspension the following equation holds:

$$TMP = 1,5ER \cos(\theta) \left| \frac{1}{1+i\omega\tau} \right| \quad (3)$$

where  $E$  is the value of the field in the fluid,  $R$  is the radius of the cell,  $\theta$  is the polar angle measured with respect to the direction of the field,  $\omega$  is the angular frequency of the external field and  $\tau$  is given by:

$$\tau = RC_m (\rho_i + \rho_a / 2) \quad (4)$$

where  $C_m$  is the capacitance of the membrane per unit area which we determine from other works<sup>25</sup> to be 15,6mF/m<sup>2</sup> while  $\rho_a$  and  $\rho_i$  are respectively the resistivity of the interior of the cell and of the fluid (typical values<sup>23</sup> are 1 Ωm).

### Effect of geometrical parameters on the shape of the nDEP cage

The spacing between the electrodes  $s$  and the thickness of the electrodes  $t$  both affect the distribution of the electric field inside the well.

We simulated the structure varying the  $s$  parameter between 75μm and 12.5μm (see Fig. S5), whilst fixing  $h=d=150$  μm,  $t=35$  μm and  $w=230$  μm.

Decreasing the  $s$  parameters causes two different effects: an overall increase in DEP<sub>y</sub> and generation of a relatively central minimum (negative DEP<sub>z</sub>) that pushes particles to the centre instead of to the well wall.

Hence the best choice for a strong cage is setting  $s$  as small as possible; on the contrary, decreasing  $s$  generates a DEP cage that could attract particles to the exact centre of the well. In Fig. S5, the force that leads particles to the minimum along the  $z$  axis (DEP<sub>z</sub>) proves, as expected, to be negative inside a region near the center ( $0 < z < 30$  μm) when the  $s$  parameter dimension is smaller than 50 μm. Again, the strength of DEP<sub>z</sub> changes with the  $s$  parameter. Fig. S5 shows that for  $0 < z < 30$  μm the trend of the force is to increase with  $s$ , while for  $z > 30$  μm the force decreases with  $s$ .

Taking all these effects into account, one may summarize that  $s=50$  μm corresponds to a good tradeoff between intensity of the DEP<sub>y</sub> force and stable collection of particles near the well wall.

We accordingly simulated the structure varying the  $t$  parameter between 35μm and 4,375μm (Fig. S5c,d), choosing the same geometrical parameters as before and keeping  $s=50$  μm. Fig. S5c shows how DEP<sub>y</sub> increases proportionally with  $t$ .

Likewise, Fig. S5d shows that  $t=35$  μm prevents DEP<sub>z</sub> from becoming negative in the central part of the well while for smaller values of  $t$  the cage is less efficient in leading particles to the wall. Consequently the best choice for the  $t$  parameter is as big as possible which in our case is fixed by technology at  $t=35$  μm.



Fig. S5: Simulation of the positive octave of the 3D structure of a well with  $d=h=150 \mu\text{m}$ ,  $w=200 \mu\text{m}$ . (a)  $\text{nDEP}_y$  and (c)  $\text{DEP}_z$  along the  $z$  axis at  $x=0 \mu\text{m}$  and  $y=10 \mu\text{m}$ ;  $t$  is fixed at  $35 \mu\text{m}$  and  $s$  is varied between  $12.5 \mu\text{m}$  and  $75 \mu\text{m}$ . (b)  $\text{DEP}_y$  and (d)  $\text{DEP}_z$  along the  $z$  axis at  $x=0 \mu\text{m}$  and  $y=10 \mu\text{m}$ ;  $s$  is fixed at  $50 \mu\text{m}$  and  $t$  is varied between  $4.375 \mu\text{m}$  and  $35 \mu\text{m}$ .

### Scaling the structure

Scaling the geometrical parameters of the microwell has an impact on the electric field cage. In order to maintain the same physical conditions in scaled structures, an appropriate scaling factor ( $\alpha$ ) should be applied to the electrical parameters and in particular to the voltages  $V$  applied. The buoyancy force on the particle suspended in a buffer  $F_B$  is proportional to the third power of the particle radius  $R$ :

$$F_B \propto R^3 \quad (5)$$

$F_{DEP}$  is proportional to  $R^3$  as well as the gradient of the square modulus of the electric field ( $\vec{\nabla}|E|^2$ ):

$$F_{DEP} \propto \frac{\Delta E^2}{\Delta x} R^3 \quad (6)$$

To achieve particle trapping the vertical  $\text{nDEP}$  force ( $F_{DEP}$ ) needs to equal  $F_B$ :

$$F_{DEP} = F_B \quad (7)$$

Hence to maintain  $F_{DEP}$  proportional to  $R^3$  when scaling the structure by a factor  $\alpha$  it is necessary to scale  $V$  with a scaling factor of  $\alpha\sqrt{\alpha}$ :

$$F_{DEP} \propto \frac{\Delta E^2}{\Delta l} R^3 \propto \frac{V^2}{l^3} R^3 \propto \frac{(\alpha\sqrt{\alpha})^2}{\alpha^3} R^3 \propto R^3 \quad (8)$$

Following this scaling rule we ensure that the particle's stable position along the BB' axis ( $y$ ) has a relative distance ( $y_s=y/d$ ) from the DD' axis that remains constant when scaling the structure by  $\alpha$ . In other words, the maximum DEP force remains constant when scaling the geometries by  $\alpha$  and the DEP cage scales its size proportionally to  $\alpha$ .

Table 1 contains a list of geometrical parameters and typical voltages applied. These values were obtained through physical simulations and were used as reference parameters in designing various scaled structures.

The signal amplitude was chosen for the basic prototype as the value that most firmly traps  $\phi 25\mu\text{m}$  polystyrene beads suspended in water. Hence the absolute vertical position  $y$  is derived as the coordinate where  $F_{DEP} = F_B$ . Table 1 shows how  $y$  is scaled proportionally to  $\alpha$ , while the relative vertical position  $y_s$  is maintained constant.

10 Table 1: Geometrical parameters and voltages applied for prototypes with different scaling factors

| Prototype                  | Symbol | Basic Prototype<br>$\alpha = 1$ | Scaled Prototype<br>$\alpha = 2$ | Scaled Prototype<br>$\alpha = 1/2$ | Scaling factor        |
|----------------------------|--------|---------------------------------|----------------------------------|------------------------------------|-----------------------|
| Diameter                   | d      | 150 $\mu\text{m}$               | 300 $\mu\text{m}$                | 75 $\mu\text{m}$                   | $\alpha$              |
| Dielectric Thickness       | h      | 150 $\mu\text{m}$               | 300 $\mu\text{m}$                | 75 $\mu\text{m}$                   | $\alpha$              |
| Electrodes width           | w      | 230 $\mu\text{m}$               | 460 $\mu\text{m}$                | 115 $\mu\text{m}$                  | $\alpha$              |
| Electrodes Spacing         | s      | 50 $\mu\text{m}$                | 100 $\mu\text{m}$                | 25 $\mu\text{m}$                   | $\alpha$              |
| Electrodes Thickness       | t      | 35 $\mu\text{m}$                | 70 $\mu\text{m}$                 | 17.5 $\mu\text{m}$                 | $\alpha$              |
| Signal Amplitude           | V      | 8 V                             | 38 V                             | 38 V                               | $\alpha\sqrt{\alpha}$ |
| Absolute vertical position | y      | -2,2 $\mu\text{m}$              | -4,4 $\mu\text{m}$               | -1,1 $\mu\text{m}$                 | $\alpha$              |
| Relative vertical position | $y_s$  | 14 %                            | 14 %                             | 14 %                               | 1                     |

### The effect of misalignment between electrodes and the center of the cavity generated during the fabrication process.

During the fabrication process the drilling of the hole may be affected by a shift in the  $x$  and  $z$  directions.

15 The structure is immune to changes along the  $z$  direction caused by a misalignment  $mis_z$  if the  $w$  parameter is large enough to permit electrodes to surround the wall of the well:

$$w > d + 2mis_z \quad (9)$$

For example for a radius  $d=150\mu\text{m}$ , if we choose  $w=230\mu\text{m}$ , the structure is immune to  $z$ -misalignments within  $\pm 40\mu\text{m}$ .

20 By contrast, misalignment  $mis_x$  along  $x$  must be guarded against so as to avoid undesired behavior by the structure. The maximum  $mis_x$  that we consider as an admissible error during the fabrication process is:

$$mis_x < (d - s) / 2 \quad (10)$$

Accordingly, we simulated the structure while shifting the DD' axis compared to the AA' axis along the  $x$  direction. The results 25 for  $mis_x=35\mu\text{m}$  are shown in Fig. S6a where one notes that particles will not be aligned along the  $z$  axis but along a curved line. Fig. S6b shows how the curvature of the alignment line increases with  $mis_x$ . The higher the voltage, the more pronounced the bending of the alignment line. In Fig. S6c we observe four particles aligned along a curved axis as predicted by physical simulations.



Fig. S6: (a) Cage shape in a well ( $\phi 150 \mu\text{m}$ ) affected by x misalignment. Top view while considering a  $35 \mu\text{m}$  misalignment (b) Different shapes of the cage considering different values of misalignments. In case 1  $\text{mis}=15 \mu\text{m}$ ; in case 2  $\text{mis}=25 \mu\text{m}$ ; in case 3  $\text{mis}=35 \mu\text{m}$ ; in case 4  $\text{mis}=45 \mu\text{m}$ . (c) Results of an experiment where the fabrication process generated a misalignment of  $35 \mu\text{m}$  in a well with  $\phi 150 \mu\text{m}$ . Polystyrene beads ( $\phi 25 \mu\text{m}$ ) were used in water.

## Reference

25 Y. Huang, x.B. Wang, F. Becker and P. Gascoyne, *Biophysical Journal*, 1997, **73**, 1118-1129.
